# Supplementary material
Source: PubMed Central journal article supplement (PMC5354189)
Supplement: supp_tpc.16.00650_TPC2016-00650-RAR2_Supplemental_DataREV.pdf [file supp_tpc.16.00650_TPC2016-00650-RAR2_Supplemental_DataREV.pdf]

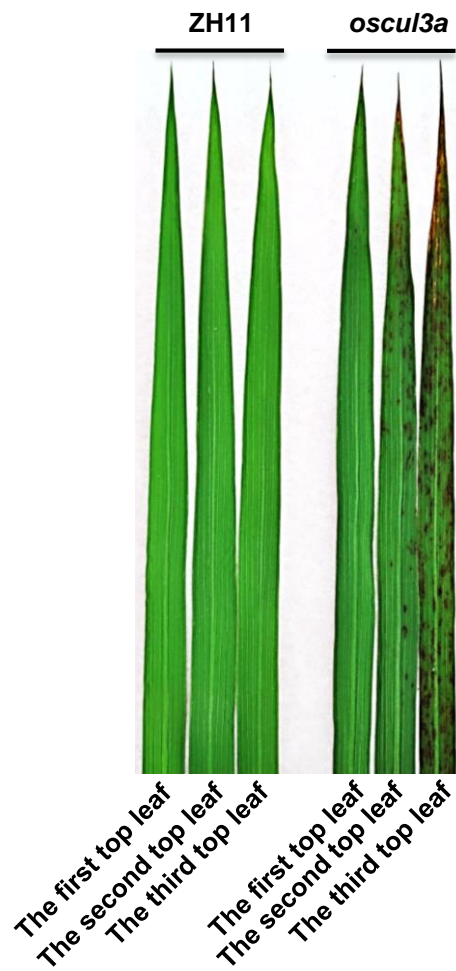

**Supplemental Figure 1:** Cell Death Phenotypes of the *oscul3a* Mutant under Field Conditions. The top three leaves were collected from ZH11 and *oscul3a* and photographed at 60 dps.

**A**

```

gDNA-OsCUL3a : ATGAGCGGGGGCGGGCCGCGAAGAAACGCAACTTCAAGATCGAGCTGTTC AAGCACCGCGTGGAGCTCGACCCCAAGTACGCGGAGCGGACATGGAAGGTCCTGGAGCAGCCATCCAC : 120
gDNA-oscul3a : ATGAGCGGGGGCGGGCCGCGAAGAAACGCAACTTCAAGATCGAGCTGTTC AAGCACCGCGTGGAGCTCGACCCCAAGTACGCGGAGCGGACATGGAAGGTCCTGGAGCAGCCATCCAC : 120
cDNA-OsCUL3a : ATGAGCGGGGGCGGGCCGCGAAGAAACGCAACTTCAAGATCGAGCTGTTC AAGCACCGCGTGGAGCTCGACCCCAAGTACGCGGAGCGGACATGGAAGGTCCTGGAGCAGCCATCCAC : 120
cDNA-oscul3a : ATGAGCGGGGGCGGGCCGCGAAGAAACGCAACTTCAAGATCGAGCTGTTC AAGCACCGCGTGGAGCTCGACCCCAAGTACGCGGAGCGGACATGGAAGGTCCTGGAGCAGCCATCCAC : 120

gDNA-OsCUL3a : GAGATCTACAACCACAACGCCAGTGGCCTCTCCTTCGAGGAGCTCTACAGTTGGTACAACCCCGGAGGCCCGCACTCCCATGATCCTCCGCTCCTGCCGTCGCGCTCGCGTTTCC : 240
gDNA-oscul3a : GAGATCTACAACCACAACGCCAGTGGCCTCTCCTTCGAGGAGCTCTACAGTTGGTACAACCCCGGAGGCCCGCACTCCCATGATCCTCCGCTCCTGCCGTCGCGCTCGCGTTTCC : 240
cDNA-OsCUL3a : GAGATCTACAACCACAACGCCAGTGGCCTCTCCTTCGAGGAGCTCTACAGTTGGTACAACCCCGGAGGCCCGCACTCCCATGATCCTCCGCTCCTGCCGTCGCGCTCGCGTTTCC : 171
cDNA-oscul3a : GAGATCTACAACCACAACGCCAGTGGCCTCTCCTTCGAGGAGCTCTACAGTTGGTACAACCCCGGAGGCCCGCACTCCCATGATCCTCCGCTCCTGCCGTCGCGCTCGCGTTTCC : 170

gDNA-OsCUL3a : CGCTTGGCGACCTAGATCCTACCGCCCCGGCCCTAACATGTGGTTAATTAGAAAAATTCAGTGTGCCAATTCCTAATAAGTTTGTCTCCTCTTGAGATGATTAATGATTATGATTAAGTAC : 360
gDNA-oscul3a : CGCTTGGCGACCTAGATCCTACCGCCCCGGCCCTAACATGTGGTTAATTAGAAAAATTCAGTGTGCCAATTCCTAATAAGTTTGTCTCCTCTTGAGATGATTAATGATTATGATTAAGTAC : 360
cDNA-OsCUL3a : ----- : -
cDNA-oscul3a : ----- : -

gDNA-OsCUL3a : GAACATTCCTGTCCGATATGTTGATGGTTGAAAGTGATTTCTTCGAGAGAATTCCTTTTAGTATTTGTGATCCTACAATTTTCGTTAAAAATACAGAATTTTATAGTCAACGATCAG : 480
gDNA-oscul3a : GAACATTCCTGTCCGATATGTTGATGGTTGAAAGTGATTTCTTCGAGAGAATTCCTTTTAGTATTTGTGATCCTACAATTTTCGTTAAAAATACAGAATTTTATAGTCAACGATCAG : 480
cDNA-OsCUL3a : ----- : -
cDNA-oscul3a : ----- : -

gDNA-OsCUL3a : TATTAGGGAGATTGGCGGATGTTAGGTGTTGGATATTGATGGGTTACTCCATCTAGTCATCTGTAGTATTGACTTAGTTGTTGGAAGCCATGCTTGTCCGCTCCTTTGGTCTGCACAGC : 600
gDNA-oscul3a : TATTAGGGAGATTGGCGGATGTTAGGTGTTGGATATTGATGGGTTACTCCATCTAGTCATCTGTAGTATTGACTTAGTTGTTGGAAGCCATGCTTGTCCGCTCCTTTGGTCTGCACAGC : 600
cDNA-OsCUL3a : ----- : -
cDNA-oscul3a : ----- : -

gDNA-OsCUL3a : AACTTGGTGATAAATAACTATTCTGAACCTCACTTGATTGTAATTTGCAATATTCCTTTCATCTGTGCAGGAGTCCCAAAACATGGTGTCCACAAGTATGGTGAGAAGCTATATGAT : 720
gDNA-oscul3a : AACTTGGTGATAAATAACTATTCTGAACCTCACTTGATTGTAATTTGCAATATTCCTTTCATCTGTGCAGGAGTCCCAAAACATGGTGTCCACAAGTATGGTGAGAAGCTATATGAT : 712
cDNA-OsCUL3a : ----- : 219
cDNA-oscul3a : ----- : 191

gDNA-OsCUL3a : GGCTGGAGAGAAGTATGACATGGCGCTTGAAGGAAATATCAAAATCAATAGAGGCTGCACAGGGTGGTTTGTCTTTCGGAGGAGCTGAATGCCAAGTGGATGGATCACAAATAAGGCATTG : 840
gDNA-oscul3a : GGCTGGAGAGAAGTATGACATGGCGCTTGAAGGAAATATCAAAATCAATAGAGGCTGCACAGGGTGGTTTGTCTTTCGGAGGAGCTGAATGCCAAGTGGATGGATCACAAATAAGGCATTG : 832
cDNA-OsCUL3a : GGCTGGAGAGAAGTATGACATGGCGCTTGAAGGAAATATCAAAATCAATAGAGGCTGCACAGGGTGGTTTGTCTTTCGGAGGAGCTGAATGCCAAGTGGATGGATCACAAATAAGGCATTG : 339
cDNA-oscul3a : GGCTGGAGAGAAGTATGACATGGCGCTTGAAGGAAATATCAAAATCAATAGAGGCTGCACAGGGTGGTTTGTCTTTCGGAGGAGCTGAATGCCAAGTGGATGGATCACAAATAAGGCATTG : 311

gDNA-OsCUL3a : CAGATGATCCGAGATATTCCTAATGTACATGGATCGAACATATGTCCCGCAATCCCGTAGAACACCTGTTTCATGAGCTTGGTTTGAATTTGTGGAGGGATCACATAATTCCAC : 951
gDNA-oscul3a : CAGATGATCCGAGATATTCCTAATGTACATGGATCGAACATATGTCCCGCAATCCCGTAGAACACCTGTTTCATGAGCTTGGTTTGAATTTGTGGAGGGATCACATAATTCCAC : 943
cDNA-OsCUL3a : CAGATGATCCGAGATATTCCTAATGTACATGGATCGAACATATGTCCCGCAATCCCGTAGAACACCTGTTTCATGAGCTTGGTTTGAATTTGTGGAGGGATCACATAATTCCAC : 450
cDNA-oscul3a : CAGATGATCCGAGATATTCCTAATGTACATGGATCGAACATATGTCCCGCAATCCCGTAGAACACCTGTTTCATGAGCTTGGTTTGAATTTGTGGAGGGATCACATAATTCCAC : 422
    
```

**B**

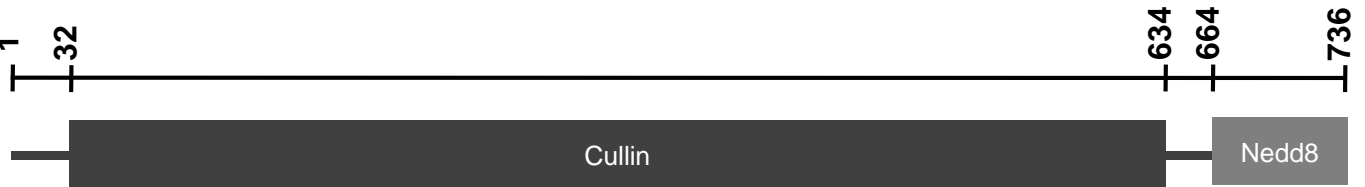

**Supplemental Figure 2: Sequence Alignments between ZH11 and the *oscul3a* Mutant.**  
 (A) Genomic DNA and cDNA of OsCUL3a were PCR amplified from ZH11 and *oscul3a* respectively. Sequence comparison was conducted using ClustalW software after sequencing.  
 (B) Protein structure of OsCUL3a.

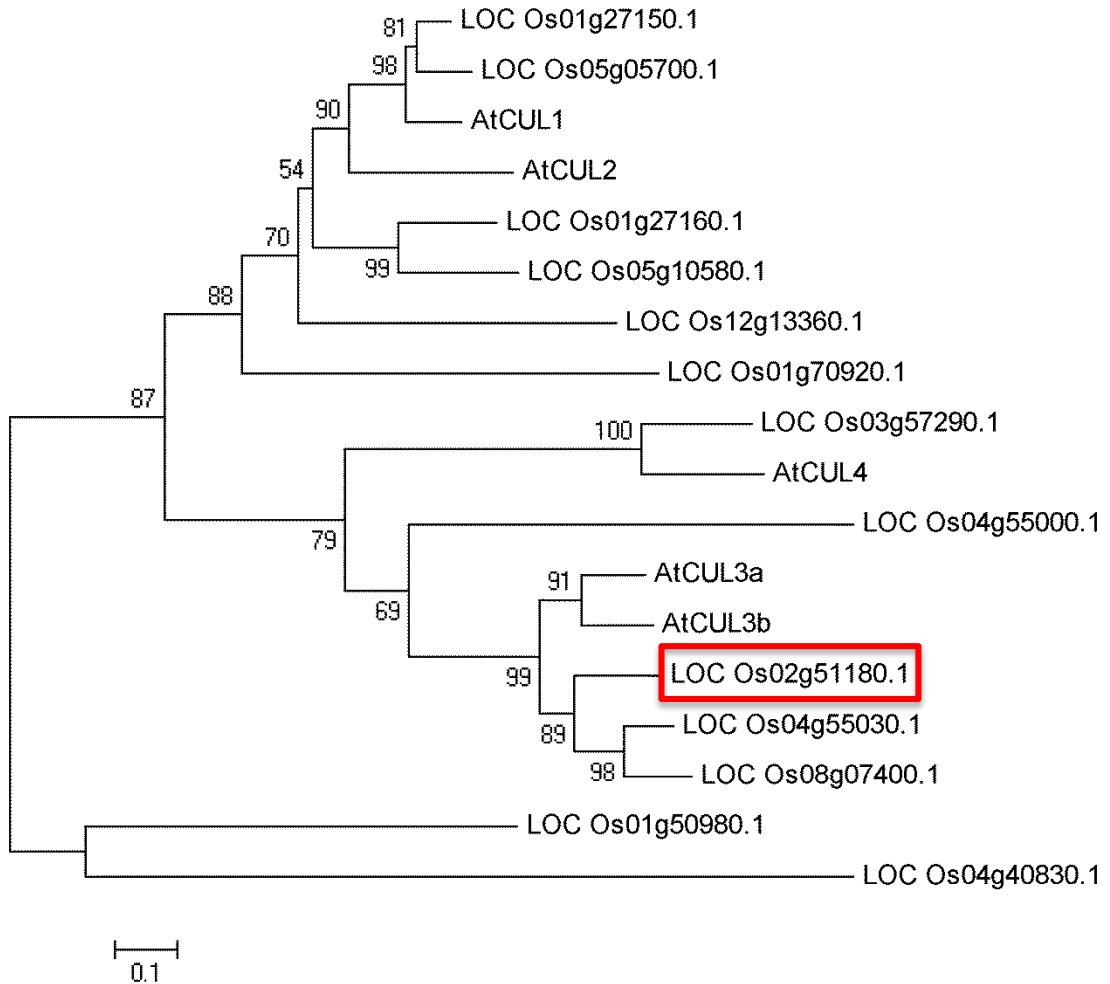

**Supplemental Figure 3:** Phylogenetic Analysis of CUL Proteins in Arabidopsis and Rice. The phylogenetic tree was generated by MEGA5 software using neighbor joining method. Numbers at nodes indicate bootstrap values. Scale bar indicates 0.1 substitutions.

Supplemental Data. Liu et al. (2017). Plant Cell 10.1105/tpc.16.00650

OsCUL3a : **MSGGGPPKRNFKIELEFKHRVLEDPKVAERLWKVLEHATHEIYNHNASGLSFEELYRSAYNMVLHKYGEKLYDGLERTVTRWLEKETS** : 100  
 OsCUL3b : **MN---SOKKRSFKIEPPFRHRVDAADPKSIEDKSWKKLEDAIREIYNHNASGLSFEELYRTAYNLVLHKHGLKLYDKLTENIKGHLKEMCRSIEDAOGSLFLE** : 97  
 OsCUL3c : **MS---SRKKPS-RIEFPRHKVETDPRFPEKAWRKLDDAIREIYNHNASGLSFEELYRTAYNLVLHKHGLKLYDKLTENMEDHLQEMRVSTEAAGGLFLV** : 96

OsCUL3a : **ELNAKMDHDKALQMIIRDILMYMDRIVVQSRRTPVHELEGLNLWRDHIITHSEMTIHSRLLDTLLELIHRERMGEMINRGLMRSITKMLMDLGAAYVQDDFE** : 200  
 OsCUL3b : **ELQRRMADHDKALQMIIRDILMYMDRITFATNKKTPVFDLGLLEWRDIIVVRTPKIHGRLLDTLLELIHRERMGEMINRGLMRSITKMLMDLGSSVYHDDFE** : 197  
 OsCUL3c : **ELQRKMDHDKALQMIIRDILMYMDRVFIFPTNKKTPVFDLGLLEWRDIIVRSPKIHGRLLDTLLELIHRERTGEVINRSGLMRSITKMLMDLGSSVYQDDFE** : 196

OsCUL3a : **KPFLEVSASFYSGESQDFIECCDCGNYLKKSERRLNEMERVSHYLDSGTEAKITSVVPEKEMIANHMHRLVHMENSGLVNMLVDDKMDDLARMYNLFRV** : 300  
 OsCUL3b : **KPFLEVSASFYSGESQDFIECCDCGNYLKKAERRLAEELEERSVQYMDAKTADKITSVVDTEMLANHMORLIHMENSGLVNMLVDDKHEDLSRMYNLFRV** : 297  
 OsCUL3c : **RPFLEVSASFYSGESQDFIECCSCGEYLKKAQRLEBAERVSQYMDAKTDEKITAIVVVKEMLANHMQRLIMENSGLVNMLVDDKMDLTMVYSLQRV** : 296

OsCUL3a : **FDGISTIRDMVTSVLRTEGKQLVVDPERLKPVEFVQRLNNEKDKHDKITINWAFGNDKIFQNALNSSFBYFINLNNSPEFISLYVDDKLRKGLKGA** : 400  
 OsCUL3b : **FDGISTIRDMVTSVLRTEGKQLVVDPEKIKDPVEFVQRLNNEKDKYDDEITISISFNDKIFQNALNSSFBYFINLNNSPEFISLYVDDKLRKGVKGANEE** : 397  
 OsCUL3c : **FDGISTIKSVMNSVVKTEGKQVMVMDPERLKPVEFVQRLNNEKDKYDSEIVTISFNDKIFQNALNSSFBYFINLNNSPEFISLYVDDKLRKGMKGANEE** : 396

OsCUL3a : **DVEVIVLDKVMMLFRYLQEKDVFEEKYKQHLAKRLLSGKIVSDDAERSMIVKLVKTECGYQFTSKLEGMFIDMKTSQDTVIDFYAKKSEELGCGPTLDVHII** : 500  
 OsCUL3b : **DVEVIVLDKVMMLFRYLQEKDVFEEKYKQHLAKRLLSGKIVTSDDAERSMIVKLVKTECGYQFTSKLEGMFIDLKTSHDTMGSFYANLS-GDTSPTISVQIIL** : 496  
 OsCUL3c : **DVEVIVLDKVMMLFRYLQEKDVFEEKYKQHLAKRLLSGKIAASDSDAERSMIVKLVKTECGYQFTSKLEGMFIDLKTSHDTMGSFYAGTPT-DLGLDAPTISVQIIL** : 495

OsCUL3a : **TTGSWPTQPCPECNLPEEILATCDNFRFTYYLGTHSGRRLTWQTNMGADIKATFGKCGKHELVNSTYQMCVLMFNSTDGLTYGDIEQDTAIPASDLKRC** : 600  
 OsCUL3b : **TTGSWPTQPCPECKLPPEIVDISEKFRAFYLGTHNGRRLTWQTNMGADIKATFG-GRRHELVNSTYQMCVLMFNSTADGLTYGDIEQDTAIPASDLKRC** : 595  
 OsCUL3c : **TTGSWPTQPCNTCNLPEEILCVSEMFRGFYLGTHNGRRLTWQTNMGADIKAVFGNCSKHELVNSTYQMCVLMFNSTADCLSYRDIEQDTAIPASDLKRC** : 595

OsCUL3a : **LOS�AVKGNVLRKEPMSKDISDDTFYVNDKFTSKLVKVKIGTVVAQKESEPEKQETRQRVEEDRKPOIEAAIVRIMKSRRVLDHNSIVAEVTKQLQA** : 700  
 OsCUL3b : **LOS�AVKGNVLRKEPMSKDISDDTFYVNDKFTSKLVKVKIGTVVAQKESEPEKQETRQRVEEDRKPOIEAAIVRIMKSRRVLDHNSIIEVTKQLQS** : 695  
 OsCUL3c : **LOS�AVKGNVLRKEPMSRDISDDNFYVNDKFTSKLVKVKIGTVVATQKESEPEKQETRQRVEEDRKPOIEAAIVRIMKSRRVLDHNSIIEVTKQLQP** : 695

OsCUL3a : **RFMPNPVVIKKRIESLIBREFLERDKADRKLYRYLA** : 736  
 OsCUL3b : **RFLPNPVIKKRIESLIBREFLERDKVDRKMYRYLA** : 731  
 OsCUL3c : **RFMPNPVVIKKRVESLIBREFLERDKADRKLYRYLA** : 731

Supplemental Figure 4: Protein Alignment of OsCUL3a, OsCUL3b, and OsCUL3c.

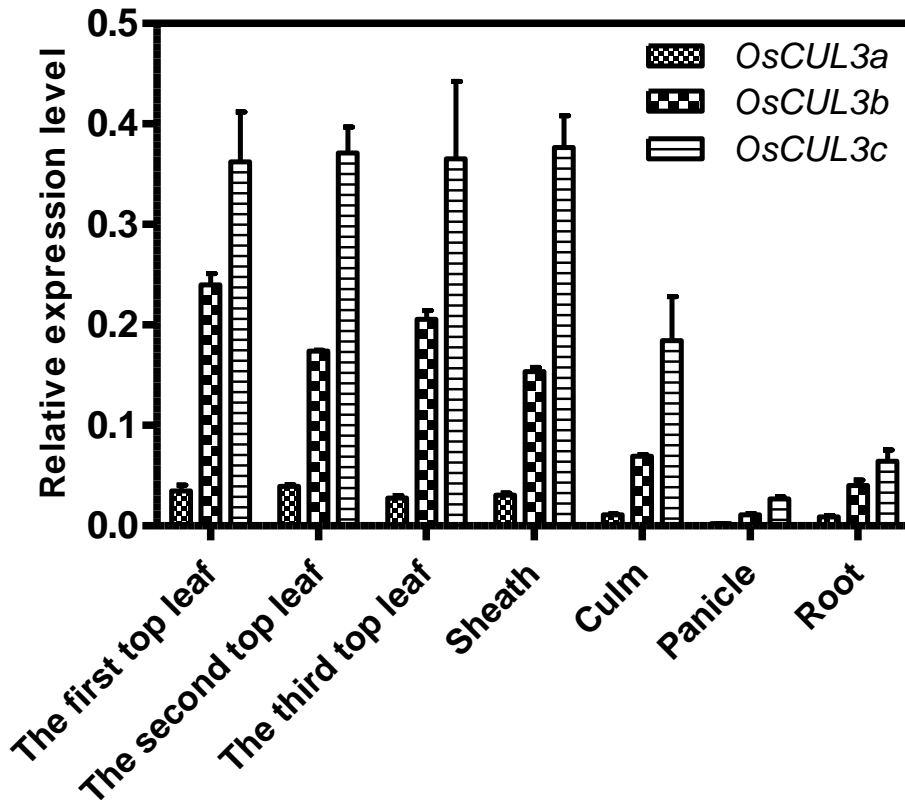

**Supplemental Figure 5:** *OsCUL3a*, *OsCUL3b*, *OsCUL3c* Are Constitutively Expressed in Rice. Different tissues were collected from ZH11 plants at the flowering stage for total RNA isolation. *OsCUL3a/b/c* mRNA level were analyzed by qRT-PCR. Error bars represent the SEM, n=3.

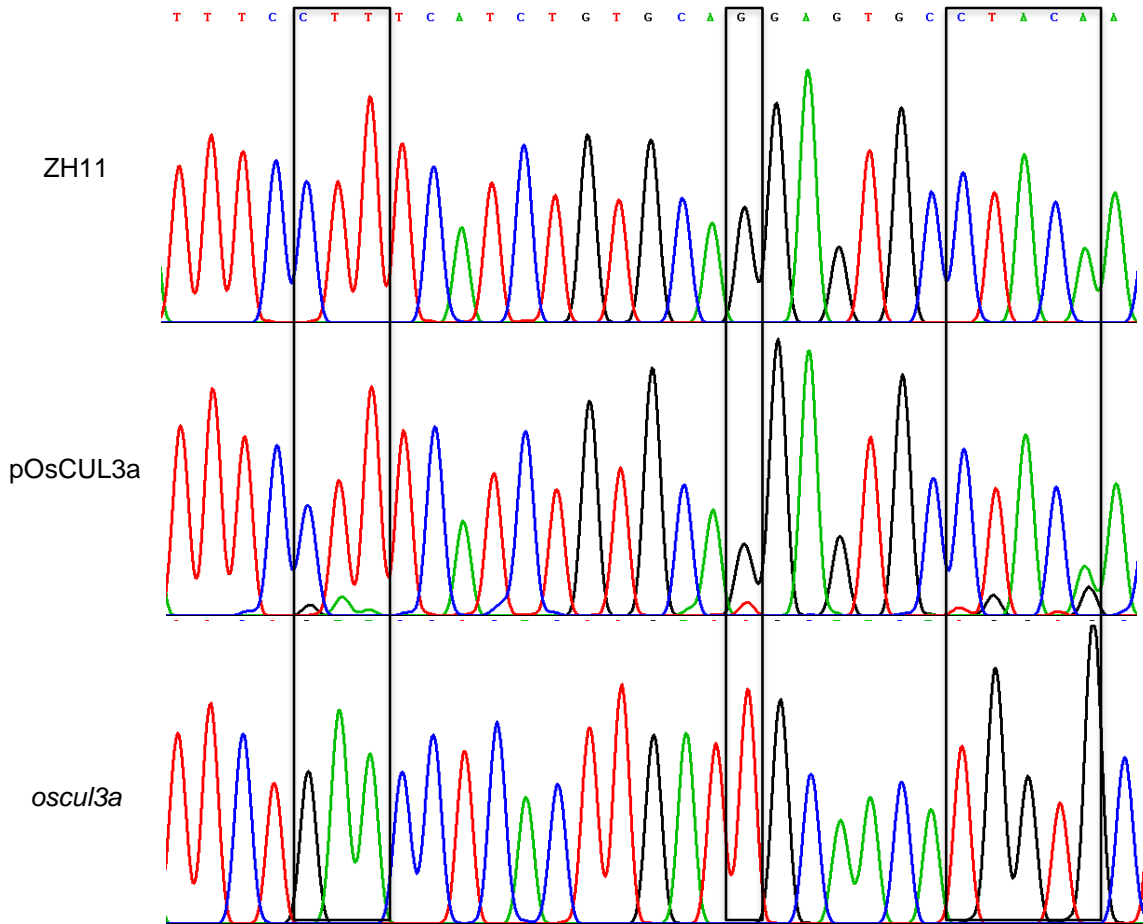

**Supplemental Figure 6:** Confirmation of the pOsCUL3a Plants by Sequencing. Sequence chromatograms obtained for the region around the mutation site in ZH11, pOsCUL3a and *oscul3a* plants indicated by pane.

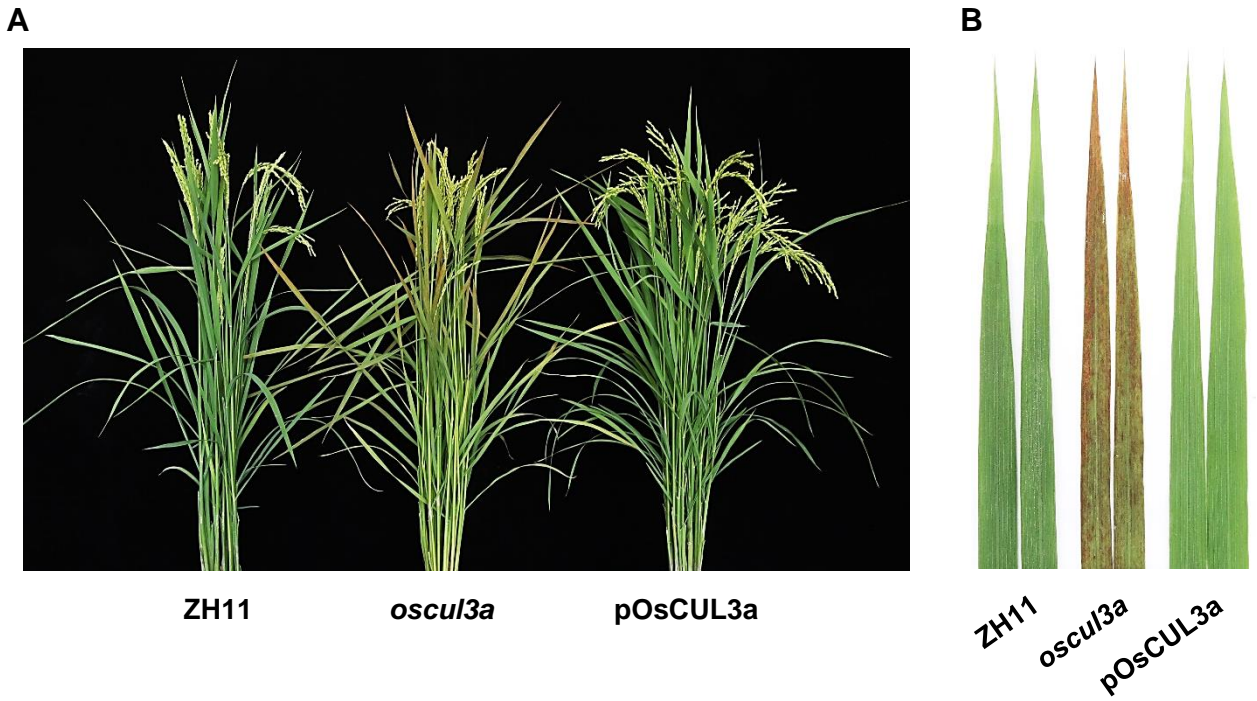

**Supplemental Figure 7:** Cell Death Phenotype of *oscul3a* is Rescued by OsCUL3a.  
(A) ZH11, *oscul3a*, and pOsCUL3a plants were grown in summer field and photographed at the filling stage.  
(B) Flag leaves collected from (A).

```
AtRBX1 : MATLDSVDVTMIPA-----GEASSSVAASSSNKMAKRFETIKKWSAVLWAWDIVVDNCAICRNHIMDLCTECQ : 67
OsRBX1A : MDKGDVAVAVPP-----SIAGASSSGAKKGRFETIKKWNVSLWAWDIVVDNCAICRNHIMDLCTECQ : 63
OsRBX1B : MSAMETDINAPPPAPAPAGAGEGSSSAAGPSSRKPGRFETIKKWNVSLWAWDIVVDNCAICRNHIMDLCTECQ : 75

AtRBX1 : ANQASATSEECTVAWEDDQNNCNKYFCILDSCMKDDHLEGVCNHAFHFHCISRWLKTRQVCPLDNSEWEFQKYGH : 142
OsRBX1A : ANQASATSEECTVAW-----GVCNHAFHFHCISRWLKTRQVCPLDNSEWEFQKYGH : 114
OsRBX1B : ANQASATSEECTVAW-----GVCNHAFHFHCISRWLKTRQVCPLDNSEWEFQKYGH : 126
```

**Supplemental Figure 8:** Protein Alignment between AtRBX1, OsRBX1a, and OsRBX1b.



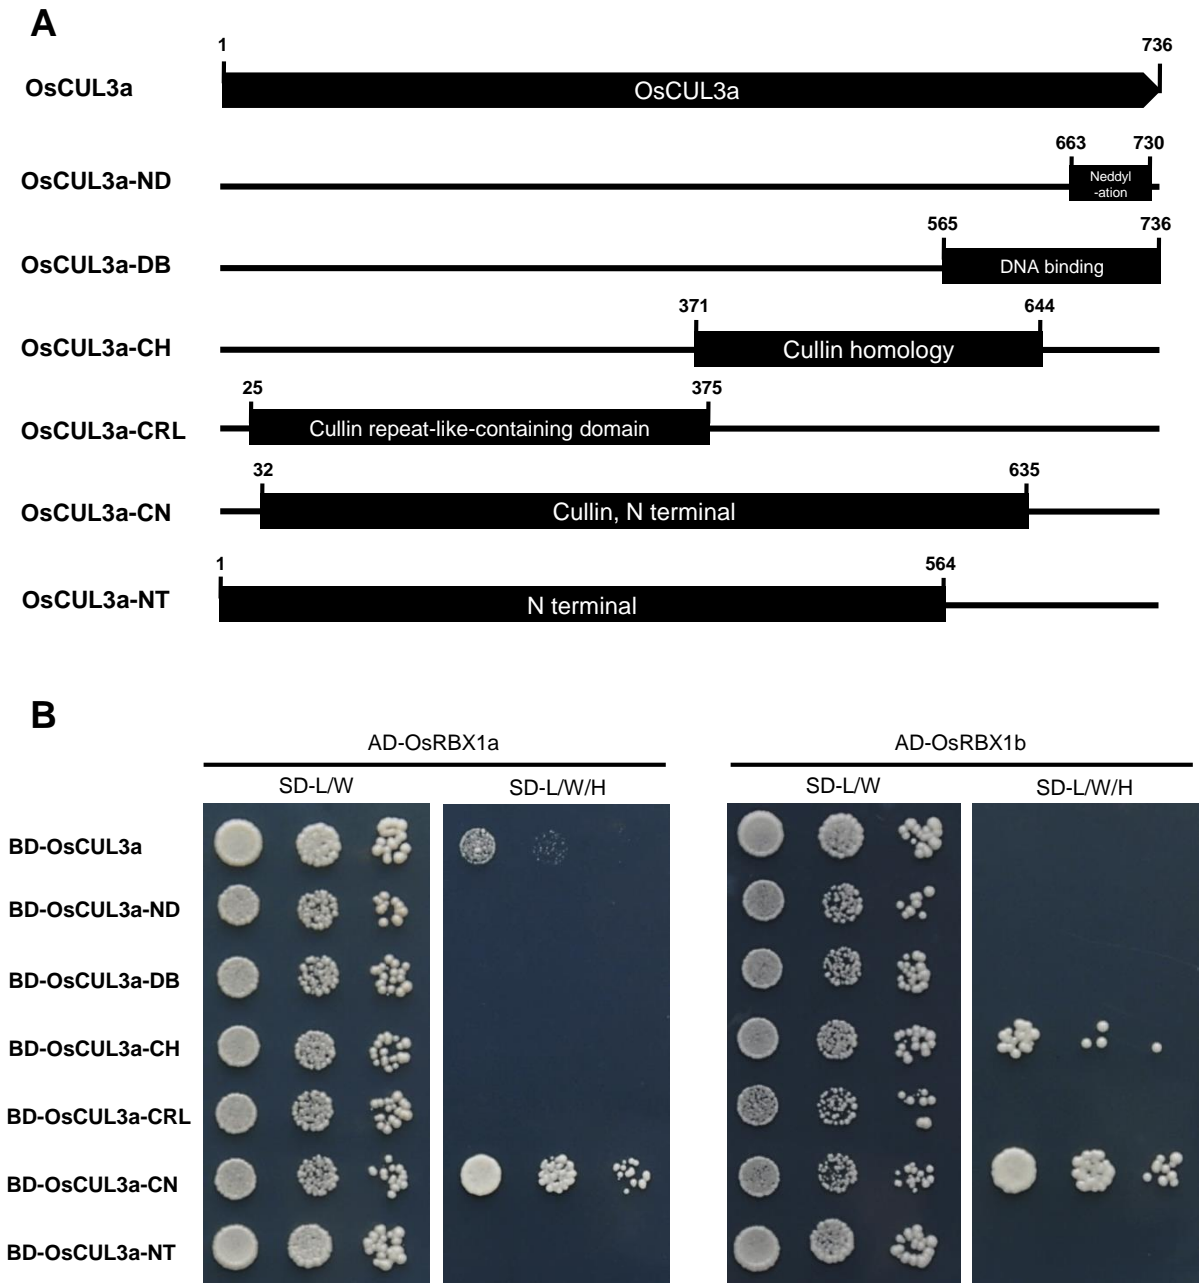

**Supplemental Figure 9: OsCUL3a Interacts with OsRBX1a and OsRBX1b in Yeast.**

(A) Schematic diagrams of full-length or truncated OsCUL3a proteins.

(B) Protein interactions as indicated by the ability of yeast cells to grow on synthetic dropout medium lacking L, W, and H in the presence of 2.5 mM 3-amino-1,2,4-triazole.

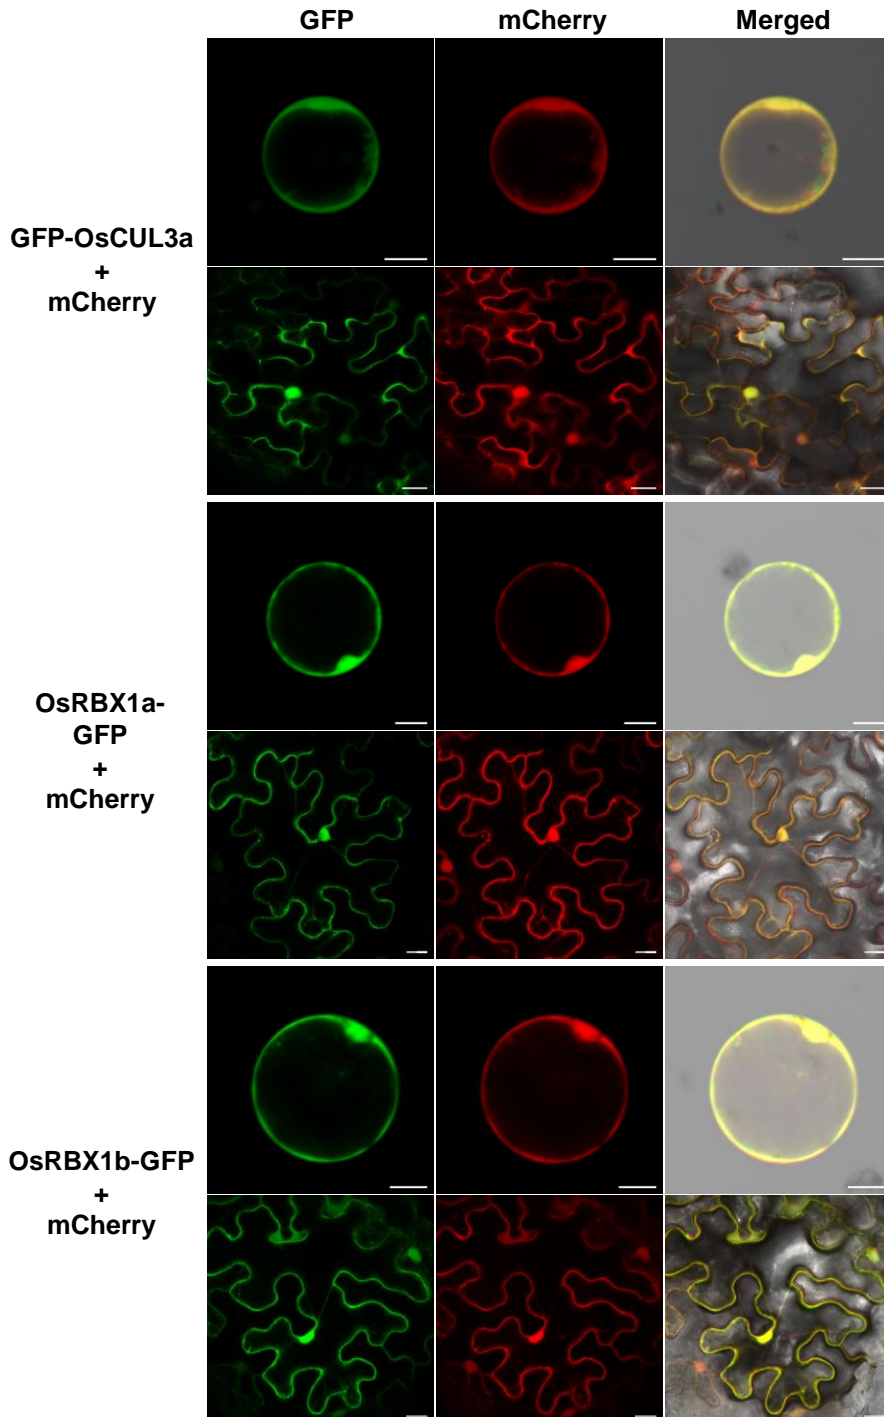

**Supplemental Figure 10:** Subcellular Localization of OsCUL3a, OsRBX1a, and OsRBX1b. GFP tagged OsCUL3a, OsRBX1a, and OsRBX1b were transiently expressed in rice protoplast or *Nicotiana benthamiana* leaves. GFP signal were detected using ZEISS confocal microscope at 36 h or 72 h post transfection. Bar=10  $\mu$ m.

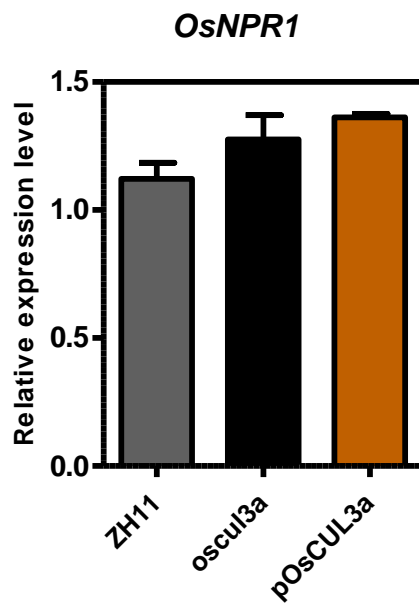

**Supplemental Figure 11:** *OsNPR1* Transcriptional Level in ZH11, *oscul3a* Mutant, and pOsCUL3a Plants.

Total RNA was isolated from the second top leaves of ZH11, *oscul3a*, and pOsCUL3a plants at 60 dps. *OsNPR1* mRNA level was analyzed by qRT-PCR.

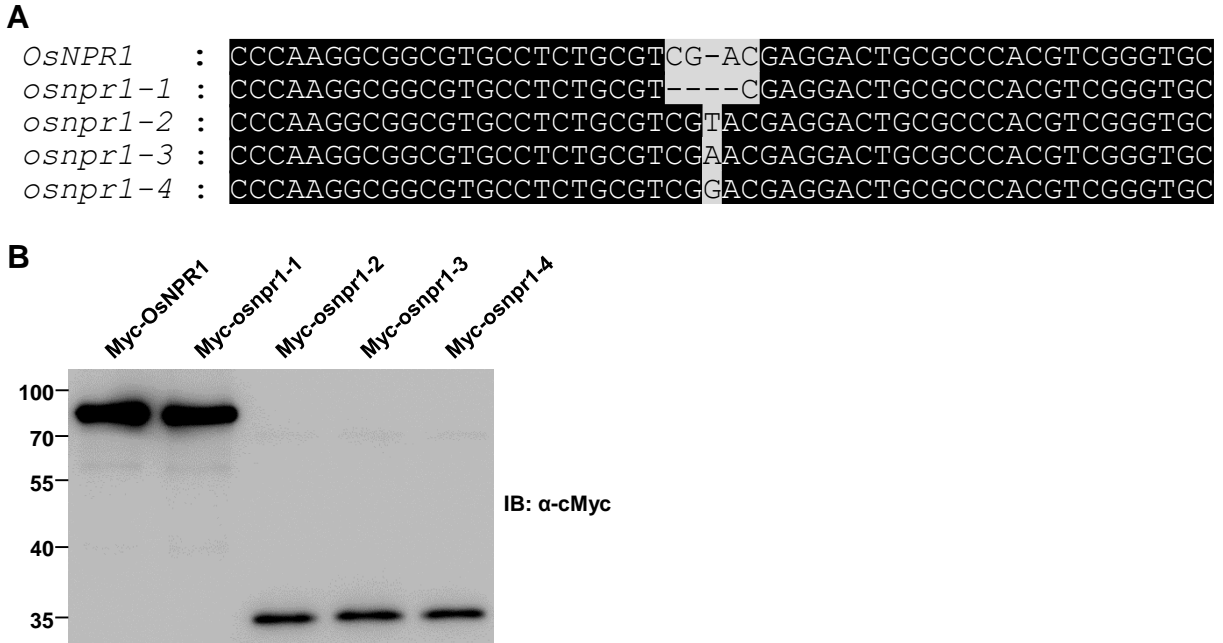

**Supplemental Figure 12:** Characterization of Different Types of the *osnpr1* Mutants Created by CRISPR/Cas9.

(A) Genomic DNA sequence alignment of *osnpr1s* flanked the mutation site.

(B) *osnpr1s* created by Crispr/Cas9 method encode 2 types *osnpr1* proteins. The full length cDNA of wild-type *OsNPR1* and 4 *osnpr1* mutants were PCR amplified and fused with Myc tag. The recombinant protein were transiently expressed in rice protoplast for western blot analysis with anti-cMyc antibody.

**Supplemental Table 1**

| <b>Primer name</b>            | <b>Primer sequence (5'-3')</b> | <b>Enzyme</b> | <b>Vectors</b> |
|-------------------------------|--------------------------------|---------------|----------------|
| <b>Primers for qRT-PCR</b>    |                                |               |                |
| qMoPot2                       | F: ACGACCCGTCTTTACTTATTTGG     |               |                |
|                               | R: AAGTAGCGTTGGTTTTGTTGGAT     |               |                |
| qPR1a                         | F: CGTGTCGGCGTGGGTGT           |               |                |
|                               | R: GGCGAGTAGTTCAGGTGATG        |               |                |
| qPR1b                         | F: TACGCCAGCCAGAGGAGC          |               |                |
|                               | R: GCCGAACCCAGAAGAGG           |               |                |
| qPR10                         | F: GTCCGGGCACCATCTACACC        |               |                |
|                               | R: CAAGCTTCGTCTCCGTCGAGT       |               |                |
| qPAL1                         | F: TTCAACGCCGACACCT            |               |                |
|                               | R: GTAGAGCGGATACGACCTG         |               |                |
| qAOS2                         | F: AAGCTGCTGCAATACGTGTACTGG    |               |                |
|                               | R: CGACGAGCAACAGCCTTCCG        |               |                |
| qWRKY45                       | F: GCCGACGACCAGCACGATCACC      |               |                |
|                               | R: ACGAGCCGACGCCGCCCTC         |               |                |
| qACTIN                        | F: CAGGCCGTCTCTCTCTGTA         |               |                |
|                               | R: AAGGATAGCATGGGGGAGAG        |               |                |
| <b>Primers for genotyping</b> |                                |               |                |
| ZN7                           | F: GCGTGAAACGGAGGGA            |               |                |
|                               | R: CAAAGGGGACCAAACATTAT        |               |                |
| ZN26                          | F: AGGAGACATAGCCTGAGGACACT     |               |                |
|                               | R: CTTTGAGCCAATCCACAATACAT     |               |                |
| ZN30                          | F: GCCTGTTGAAGTTGGTAGCG        |               |                |
|                               | R: AGGGACTGCGGGATGGA           |               |                |
| ZN32                          | F: CTAACCTTGCCAAATTCGCTAC      |               |                |
|                               | R: TCGTGGTTACATTTAAGATGCA      |               |                |
| ZN34                          | F: GTGGTTCAGTCAAAGATGCCA       |               |                |
|                               | R: ACTCTAACCCCTCAGGAGTACATACC  |               |                |
| ZN35                          | F: GCTCGGCTAAGATTCATACATC      |               |                |
|                               | R: GGTTATCACATACCGTGGTTTC      |               |                |

| Primer name                                 | Primer sequence (5'-3')                               | Enzyme   | Vectors     |
|---------------------------------------------|-------------------------------------------------------|----------|-------------|
| <b>Primers for genotyping</b>               |                                                       |          |             |
| ZN36                                        | F: TAGCACAATCAAAGGAACATGC                             |          |             |
|                                             | R: GCCCCTCAAACAACCTCAATCT                             |          |             |
| ZN9                                         | F: GTCAGCGTCTAGGCAAGG                                 |          |             |
|                                             | R: GAATCGATATGAACCGACAAT                              |          |             |
| ZN19                                        | F: CACAACCTTCAACACGAGAACC                             |          |             |
|                                             | R: TGCCCAAAGCAATAGCC                                  |          |             |
| <b>Primers used for vector construction</b> |                                                       |          |             |
| 1300-OsCUL3a                                | F: GGCCAGTGCC <u>AGCTTTTT</u> GTCAAGGCTGAATAACGA      | Hind III | pCAMBIA1300 |
|                                             | R: CCATGATTAC <u>GAATTC</u> TAGCCTCAAATTC AACCCGTA    | EcoR I   |             |
| GFP-OsCUL3a                                 | F: GCTTGATATC <u>GAATTC</u> ATGAGCGGGGGCGGGC          | EcoR I   | pYBA1152    |
|                                             | R: CGGGCTGCAG <u>GAATTC</u> TGCAAGATAGCGATATAACTTCCTA | EcoR I   |             |
| OsRBX1a-GFP                                 | F: TGGCGGCCGCTC <u>TAG</u> AATGGACAAGGGCGACGT         | Xba I    | pYBA1132    |
|                                             | R: CGGTATCGATA <u>AAGCTT</u> GTGACCATACTTCTGGA ACTCCC | Hind III |             |
| OsRBX1b-GFP                                 | F: TGGCGGCCGCTC <u>TAG</u> AATGTGGCCATGGAGACCG        | Xba I    | pYBA1132    |
|                                             | R: CGGTATCGATA <u>AAGCTT</u> GTGCCATATTTCTGAAATTC CC  | Hind III |             |
| BD-OsCUL3a                                  | F: CATGGAGGCC <u>GAATTC</u> AAGAGCGGGACCTCACC         | EcoR I   | pGBKT7      |
|                                             | R: GGATCCCCGG <u>GAATTC</u> GACCTTCTATGCAAGATAGCG     | EcoR I   |             |
| BD-OsCUL3a-CN                               | F: AGGAGGACCTGCATATGTGGAAGGTCCTGGAGCA                 | Nde I    | pGBKT7      |
|                                             | R: GGATCCCCGG <u>GAATTC</u> CTTGTGCTTGAAGTAGAATGT     | EcoR I   |             |
| BD-OsCUL3a-ND                               | F: AGGAGGACCTGCATATGTTACAAGCAAGCTTGTTAAG              | Nde I    | pGBKT7      |
|                                             | R: GGATCCCCGG <u>GAATTC</u> TGCAAGATAGCGATATAACTTCC   | EcoR I   |             |
| BD-OsCUL3a-NT                               | F: AGGAGGACCTGCATATGATGAGCGGGGGCGGGC                  | Nde I    | pGBKT7      |
|                                             | R: GGATCCCCGG <u>GAATTC</u> TACATTTAGTTCATGCTTCTGACC  | EcoR I   |             |
| BD-OsCUL3a-CRL                              | F: AGGAGGACCTGCATATGAAACGCAACTTCAAGATCGAG             | Nde I    | pGBKT7      |
|                                             | R: GGATCCCCGG <u>GAATTC</u> GTTTAAAGTTGATGAAGTACTC    | EcoR I   |             |
| BD-OsCUL3a-CH                               | F: AGGAGGACCTGCATATGTTCACTTAAACAACAGG                 | Nde I    | pGBKT7      |
|                                             | R: GGATCCCCGG <u>GAATTC</u> CCCAATCTTGACCTTAACAAG     | EcoR I   |             |
| BD-OsCUL3a-DB                               | F: AGGAGGACCTGCATATGTCCAATTATCAGATGTGTGTT             | Nde I    | pGBKT7      |
|                                             | R: GGATCCCCGG <u>GAATTC</u> CTATGCAAGATAGCGATATAAC    | EcoR I   |             |

| Primer name                                 | Primer sequence (5'-3')                     | Enzyme   | Vectors        |
|---------------------------------------------|---------------------------------------------|----------|----------------|
| <b>Primers used for vector construction</b> |                                             |          |                |
| AD-OsNPR1                                   | F: GGAGGCCAGTGAATTCATGGAGCCCGACCAGCC        | EcoR I   | pGADT7         |
|                                             | R: CACCCGGGTGGAATTCATCTCCTTGGTGAATG         | EcoR I   |                |
| AD-OsRBX1a                                  | F: GGAGGCCAGTGAATTCATGGACAAGGGCGACGT        | EcoR I   | pGADT7         |
|                                             | R: CACCCGGGTGGAATTCCTAGTGACCATACTTCTGGAATC  | EcoR I   |                |
| AD-OsRBX1b                                  | F: GGAGGCCAGTGAATTCATGTCGGCCATGGAGACCG      | EcoR I   | pGADT7         |
|                                             | R: CACCCGGGTGGAATTCCTAGTGCCCATATTTCTGAAATC  | EcoR I   |                |
| OsCUL3a-NLuc                                | F: CGGGGACGAGCTCGGTACCAAGAGCGGGACCTCACC     | Kpn I    | p35S::NLuc     |
|                                             | R: ACGAGATCTGGTCTGACTGCAAGATAGCGATATAACTTC  | Sal I    |                |
| CLuc-OsNPR1                                 | F: ACGCGTCCCGGGGCGGTACCATGGAGCCCGACCAGCC    | Kpn I    | p35S::CLuc     |
|                                             | R: AGCTCTGCAGGTCGACTCATCTCCTTGGTGAATG       | Sal I    |                |
| CLuc-OsRBX1a                                | F: ACGCGTCCCGGGGCGGTACCATGGACAAGGGCGACGT    | Kpn I    | p35S::CLuc     |
|                                             | R: AGCTCTGCAGGTCGACTAGTGACCATACTTCTGGAATC   | Sal I    |                |
| CLuc-OsRBX1b                                | F: ACGCGTCCCGGGGCGGTACCATGTCGGCCATGGAGACCG  | Kpn I    | p35S::CLuc     |
|                                             | R: AGCTCTGCAGGTCGACTAGTGCCCATATTTCTGAAATC   | Sal I    |                |
| YN-OsCUL3a                                  | F: GCCTACTAGTGGATCCATGAGCGGGGGCGGGC         | BamH I   | pSPYNE (R) 173 |
|                                             | R: GAGCGGTACCCTCGAGCTATGCAAGATAGCGATATAAC   | Xho I    |                |
| YN-OsCUL3a-NT                               | F: GCCTACTAGTGGATCCATGAGCGGGGGCGGGC         | BamH I   | pSPYNE (R) 173 |
|                                             | R: GAGCGGTACCCTCGAGTACATTTAGTTCATGCTTCTGACC | Xho I    |                |
| YC-OsRBX1a                                  | F: CGCCACTAGTGGATCCATGGACAAGGGCGACGT        | BamH I   | pSPYCE (M)     |
|                                             | R: GAGCGGTACCCTCGAGGTGACCATACTTCTGGAATCCC   | Xho I    |                |
| YC-OsRBX1b                                  | F: CGCCACTAGTGGATCCATGTCGGCCATGGAGACCG      | BamH I   | pSPYCE (M)     |
|                                             | R: GAGCGGTACCCTCGAGGTGCCCATATTTCTGAAATCCC   | Xho I    |                |
| 4HA-OsCUL3a                                 | F: AGATTACGCTGGATCCATGAGCGGGGGCGGGC         | BamH I   | Ubi::HA        |
|                                             | R: CCGCACTAGTAAGCTTCTATGCAAGATAGCGATATAAC   | Hind III |                |
| 4Myc-OsNPR1                                 | F: CTTGAATTCGGGATCCATGGAGCCCGACCAGCC        | BamH I   | Ubi::Myc       |
|                                             | R: CCGCACTAGTAAGCTTTCATCTCCTTGGTGAATG       | Hind III |                |
| C-OsNPR1                                    | F: GGCGTGCCTCTGCGTGCACG                     |          | pOsU3-sgRNA    |
|                                             | R: CGTCGACGCAGAGGCACGCC                     |          |                |
| CS-OsNPR1                                   | F: CCGCCTCTCCGACAACCTC                      |          |                |
|                                             | R: GAGTCGCATCCACACGTTCA                     |          |                |
